# Supplementary material
Source: PubMed Central journal article supplement (PMC3318499)
Supplement: supp_50.4.1355_JCM-JCM06094-11-s02.pdf [file supp_50.4.1355_JCM-JCM06094-11-s02.pdf]

# MLST Results

Sequence Type: *Unknown ST\**

\*Please note that one or more loci do not match perfectly to any previously registered MLST allele. We recommend verifying the results by traditional methods for MLST.

## SETTINGS:

Organism: *Pseudomonas aeruginosa*

MLST Profile: *paeruginosa*

Genes in MLST Profile: 7

| Locus      | %Identity | HSP Length / Allele Length | Gaps | Allele         |
|------------|-----------|----------------------------|------|----------------|
| <i>acs</i> | 99.74%    | 390/390                    | 0    | <i>acs_28</i>  |
| <i>aro</i> | 100%      | 349/498                    | 0    | <i>aro_122</i> |
| <i>gua</i> | 100%      | 373/373                    | 0    | <i>gua_11</i>  |
| <i>mut</i> | 100%      | 442/442                    | 0    | <i>mut_11</i>  |
| <i>nuo</i> | 100%      | 366/366                    | 0    | <i>nuo_4</i>   |
| <i>pps</i> | 100%      | 370/370                    | 0    | <i>pps_12</i>  |
| <i>trp</i> | 100%      | 443/443                    | 0    | <i>trp_3</i>   |

extended output

## CONTIGS INFO:

Technology: *Illumina Single End Reads*

N50: 2670

**acs: WARNING, Identity: 99.74%, Length/HSP: 390/390, Gaps: 0, acs\_28 is the best match for acs**

MLST allele seq: **ggcccgttggccaacggcgccaccaccattctgttcgagggcgtgccgaactaccccgac**  
Hit in genome: **ggcccgttggccaacggcgccaccaccattctgttcgagggcgtgccgaactaccccgac**

MLST allele seq: **gtgaccgcgctggcgaaaatcatcgacaagcacaagggtcaacatcctctacaccgcgcc**  
Hit in genome: **gtgaccgcgctggcgaaaatcatcgacaagcacaagggtcaacatcctctacaccgcgcc**

MLST allele seq: **accgcgatccgcgcgatgatggccgaaggcaaggcggcggtggccggtgccgacggttcc**  
Hit in genome: **accgcgatccgcgcgatgatggccgaaggcaaggcggcggtggccggtgccgacggttcc**

MLST allele seq: **agcctgcgctctgctcggttcgggtgggcgagccgatcaacccggaagcctggcagtggtac**  
Hit in genome: **agcctgcgctctgctcggttcgggtgggcgagccgatcaacccggaagcctggcagtggtac**

MLST allele seq: **tacgagaccgctcggccagtcgcgctgcccgatcgtcgacacctggtggcagaccgagacc**  
Hit in genome: **tacgagaccgctcggccagtcgcgctgcccgatcgtcgacacctggtggcagaccgagacc**

MLST allele seq: **ggcgccctgcctgatgaccccgctgcccggcgcccacgcgatgaagccgggctctgcagcc**  
Hit in genome: **ggcgccctgcctgatgaccccgctgcccggcgcccacgcgatgaagccgggctctgcagcc**

MLST allele seq: **aagccgttcttcggcgtggtaccggcactg**  
Hit in genome: **aagccgttcttcggcgtggtaccggcactg**

**aro: WARNING, Identity: 100%, Length/HSP: 498/349, Gaps: 0, aro\_122 is the best**

**match for aro**

MLST allele seq: atgtcaccgtgccgttcaaggaagaggcctatcgtctggtggacgaattgagcgagcggg  
Hit in genome:

MLST allele seq: ccaccggggccggggcggtgaacaccctgatccgcctcgccgacggctgcctgcgcggcg  
Hit in genome:

MLST allele seq: acaacaccgacggcggggcttgctgcccgacctgacggcgaaacgcccggggtcgagctgc  
Hit in genome: gacctgacggcgaaacgcccggggtcgagctgc

MLST allele seq: gcggcaagcgggttctcctgctcggcgccggcggtgcggtgctggtgggtgctcgaaccct  
Hit in genome: gcggcaagcgggttctcctgctcggcgccggcggtgcggtgctggtgggtgctcgaaccct

MLST allele seq: tcctcggcgagtgcccggcgagttgctgatcgccaaccgcacggcgcggaaggccgtgg  
Hit in genome: tcctcggcgagtgcccggcgagttgctgatcgccaaccgcacggcgcggaaggccgtgg

MLST allele seq: acctggccgagcgggttcgccgacctcggcgcggtgacggctgcggtttcgccgaggtgc  
Hit in genome: acctggccgagcgggttcgccgacctcggcgcggtgacggctgcggtttcgccgaggtgc

MLST allele seq: aagggcctttcgacctgatcgtcaacggcacctcggccagtcttgccggcgacgtgccgc  
Hit in genome: aagggcctttcgacctgatcgtcaacggcacctcggccagtcttgccggcgacgtgccgc

MLST allele seq: cgctggcgagagcgtgatcgagcccggccgtaccgtctgctacgacatgatgatgcca  
Hit in genome: cgctggcgagagcgtgatcgagcccggccgtaccgtctgctacgacatgatgatgcca

MLST allele seq: aggaaccgactgccttca  
Hit in genome: aggaaccgactgccttca

**gua: PERFECT MATCH, Identity: 100%, Length/HSP: 373/373, Gaps: 0, gua\_11 is the best match for gua**

MLST allele seq: ctgctaggcctctccggcgggcggtggactcctcgggtggcgccgctgctgcacaaggcc  
Hit in genome: ctgctaggcctctccggcgggcggtggactcctcgggtggcgccgctgctgcacaaggcc

MLST allele seq: atcggcgaccaactgacctgctgttctcgcgacaacggcctgctgcgctgcacgaaggc  
Hit in genome: atcggcgaccaactgacctgctgttctcgcgacaacggcctgctgcgctgcacgaaggc

MLST allele seq: gaccaggtgatggccatggttcggcgagaacatgggctgaaggatccgcgccaacgcc  
Hit in genome: gaccaggtgatggccatggttcggcgagaacatgggctgaaggatccgcgccaacgcc

MLST allele seq: gaggacaagttcctcggccgcctggccggcgctcggcgaccgggaagagaagcgcaagatc  
Hit in genome: gaggacaagttcctcggccgcctggccggcgctcggcgaccgggaagagaagcgcaagatc

MLST allele seq: atcggccgcaccttcacgaagttttcgacgaagaagccaccaagctgcaggacgtgaag  
Hit in genome: atcggccgcaccttcacgaagttttcgacgaagaagccaccaagctgcaggacgtgaag

MLST allele seq: ttctcggcccagggcaccatctaccccgcgctgatcgagtcggccggcgccaagaccggc  
Hit in genome: ttctcggcccagggcaccatctaccccgcgctgatcgagtcggccggcgccaagaccggc

MLST allele seq: aaggcccacgtga  
Hit in genome: aaggcccacgtga

**mut: PERFECT MATCH, Identity: 100%, Length/HSP: 442/442, Gaps: 0, mut\_11 is the best match for mut**

MLST allele seq: ctgcaggaagtcacaaagcgcctggcgctggcccgtttcgacgtggctttccacctgcgc  
Hit in genome: ctgcaggaagtcacaaagcgcctggcgctggcccgtttcgacgtggctttccacctgcgc

MLST allele seq: cacaacggcaagaccatcttcgccctgcacgaggcgcgagacgagctggcccgcgcgcgc  
Hit in genome: cacaacggcaagaccatcttcgccctgcacgaggcgcgagacgagctggcccgcgcgcgc

MLST allele seq: cgggtcggcgcgggtgtgcgccaggcattcctcgagcaggcgctgccgatcgaggtcgag  
Hit in genome: cgggtcggcgcgggtgtgcgccaggcattcctcgagcaggcgctgccgatcgaggtcgag

MLST allele seq: cgcaacggcctgcacctgtggggttgggtcggcttgccgaccttctcccgcagccagccg  
Hit in genome: cgcaacggcctgcacctgtggggttgggtcggcttgccgaccttctcccgcagccagccg

MLST allele seq: gacctgcagtacttctatgtgaacgggcgcatggtgcgcgacaagctggtcgcccacgcg  
Hit in genome: gacctgcagtacttctatgtgaacgggcgcatggtgcgcgacaagctggtcgcccacgcg

MLST allele seq: gtgcgccagggttatcgcgacgtgctgtacaacggccggcatccgaccttcgtgctgttc  
Hit in genome: gtgcgccagggttatcgcgacgtgctgtacaacggccggcatccgaccttcgtgctgttc

MLST allele seq: ttcgaagtcgatccggcgggtggtggacgtcaacgtgcacccgaccaagcacgaagttcgc  
Hit in genome: ttcgaagtcgatccggcgggtggtggacgtcaacgtgcacccgaccaagcacgaagttcgc

MLST allele seq: ttccgtgacagccggatggtcc  
Hit in genome: ttccgtgacagccggatggtcc

**nuo: PERFECT MATCH, Identity: 100%, Length/HSP: 366/366, Gaps: 0, nuo\_4 is the best match for nuo**

MLST allele seq: atgttcctcaacctcggcccgaaccacccgctccgccacggcgcttccgcatcatcctg  
Hit in genome: atgttcctcaacctcggcccgaaccacccgctccgccacggcgcttccgcatcatcctg

MLST allele seq: caactggacggcgaggagatcatcgactgctgctccggagatcggtaccaccaccgcgcc  
Hit in genome: caactggacggcgaggagatcatcgactgctgctccggagatcggtaccaccaccgcgcc

MLST allele seq: gccgagaagatggccgagcggcagtcctggcacagtttcatcccctacaccgaccgcatc  
Hit in genome: gccgagaagatggccgagcggcagtcctggcacagtttcatcccctacaccgaccgcatc

MLST allele seq: gactacctcggcgggggtgatgaacaacctgccctacgtactctcgggtggagaagctcgcc  
Hit in genome: gactacctcggcgggggtgatgaacaacctgccctacgtactctcgggtggagaagctcgcc

MLST allele seq: gggatcaaggtgccccagcgggtcgacgtgatccggatcatgatggcggagtcttccgt  
Hit in genome: gggatcaaggtgccccagcgggtcgacgtgatccggatcatgatggcggagtcttccgt

MLST allele seq: atcctgaaccacctgctgtacctgggcacctatatccaggacgtcggcgccatgaccccg  
Hit in genome: atcctgaaccacctgctgtacctgggcacctatatccaggacgtcggcgccatgaccccg

MLST allele seq: gtgttc  
Hit in genome: gtgttc

**pps: PERFECT MATCH, Identity: 100%, Length/HSP: 370/370, Gaps: 0, pps\_12 is the best match for pps**

MLST allele seq: catcgtccaggcacgcccggaaaccgtgaagagccgcgccacgcgccacggatcaggagcg  
Hit in genome: catcgtccaggcacgcccggaaaccgtgaagagccgcgccacgcgccacggatcaggagcg

MLST allele seq: ctacctgctgaaagagaaggggaccgtcctggtggaagggcgtgccatcggccagcgcac  
Hit in genome: ctacctgctgaaagagaaggggaccgtcctggtggaagggcgtgccatcggccagcgcac

MLST allele seq: cggtgccgggtccgggtcaaggtgatcaacgacgtgtcggaaatggacaaggtccaaccggg  
Hit in genome: cggtgccgggtccgggtcaaggtgatcaacgacgtgtcggaaatggacaaggtccaaccggg

MLST allele seq: tgacgtcctggtctccgacatgaccgaccggactgggagccgggtgatgaagcgcgccag  
Hit in genome: tgacgtcctggtctccgacatgaccgaccggactgggagccgggtgatgaagcgcgccag

MLST allele seq: cgccatcgtcaccacaccgcccggggcgtacctgccacgcggcgatcatcgctcgcgaact  
Hit in genome: cgccatcgtcaccacaccgcccggggcgtacctgccacgcggcgatcatcgctcgcgaact

MLST allele seq: aggcattcccggcggtggtcgggttgcggcaacgccaccagatcctgcaggatggccaggg  
Hit in genome: aggcattcccggcggtggtcgggttgcggcaacgccaccagatcctgcaggatggccaggg

MLST allele seq: ggtgaccggtt

Hit in genome: ggtgaccgtt

**trp: PERFECT MATCH, Identity: 100%, Length/HSP: 443/443, Gaps: 0, trp\_3 is the best match for trp**

MLST allele seq: tgtcgtgggcagctcgccggaggtgctggtacgggtcgaggatggcctggtgacggtgcg  
Hit in genome: tgtcgtgggcagctcgccggaggtgctggtacgggtcgaggatggcctggtgacggtgcg

MLST allele seq: cccgatcgccggtaccggtccgcgcgggatcaacgaagaggccgacctggcgctggagca  
Hit in genome: cccgatcgccggtaccggtccgcgcgggatcaacgaagaggccgacctggcgctggagca

MLST allele seq: ggatctgctgtcggacgccaaggagatcgccgagcacctgatgctgatcgacctggggcg  
Hit in genome: ggatctgctgtcggacgccaaggagatcgccgagcacctgatgctgatcgacctggggcg

MLST allele seq: caacgacgtggggcgggtgtccgacatcggcgcggtgaagggtcaccgaaaaaatggtgat  
Hit in genome: caacgacgtggggcgggtgtccgacatcggcgcggtgaagggtcaccgaaaaaatggtgat

MLST allele seq: cgaacgttactccaacgtcatgcacatcgtgtccaacgtcaccgggcaattgcgcgaggg  
Hit in genome: cgaacgttactccaacgtcatgcacatcgtgtccaacgtcaccgggcaattgcgcgaggg

MLST allele seq: gctcagcgcgatggacgcgctgcgggcgatcctgccggcgggtacgctgtccggcgcgcc  
Hit in genome: gctcagcgcgatggacgcgctgcgggcgatcctgccggcgggtacgctgtccggcgcgcc

MLST allele seq: gaagatccgcgccatggagatcatcgacgagctggagccggtcaagcgtggagtctacgg  
Hit in genome: gaagatccgcgccatggagatcatcgacgagctggagccggtcaagcgtggagtctacgg

MLST allele seq: cggcgcggtcggctacctggcat  
Hit in genome: cggcgcggtcggctacctggcat
